# Supplementary material for: Novel Large Sulfur Bacteria in the Metagenomes of Groundwater-Fed Chemosynthetic Microbial Mats in the Lake Huron Basin
Source: PubMed Central journal article supplement (PMC5421297; doi:10.3389/fmicb.2017.00791), 2017-05-08

**A**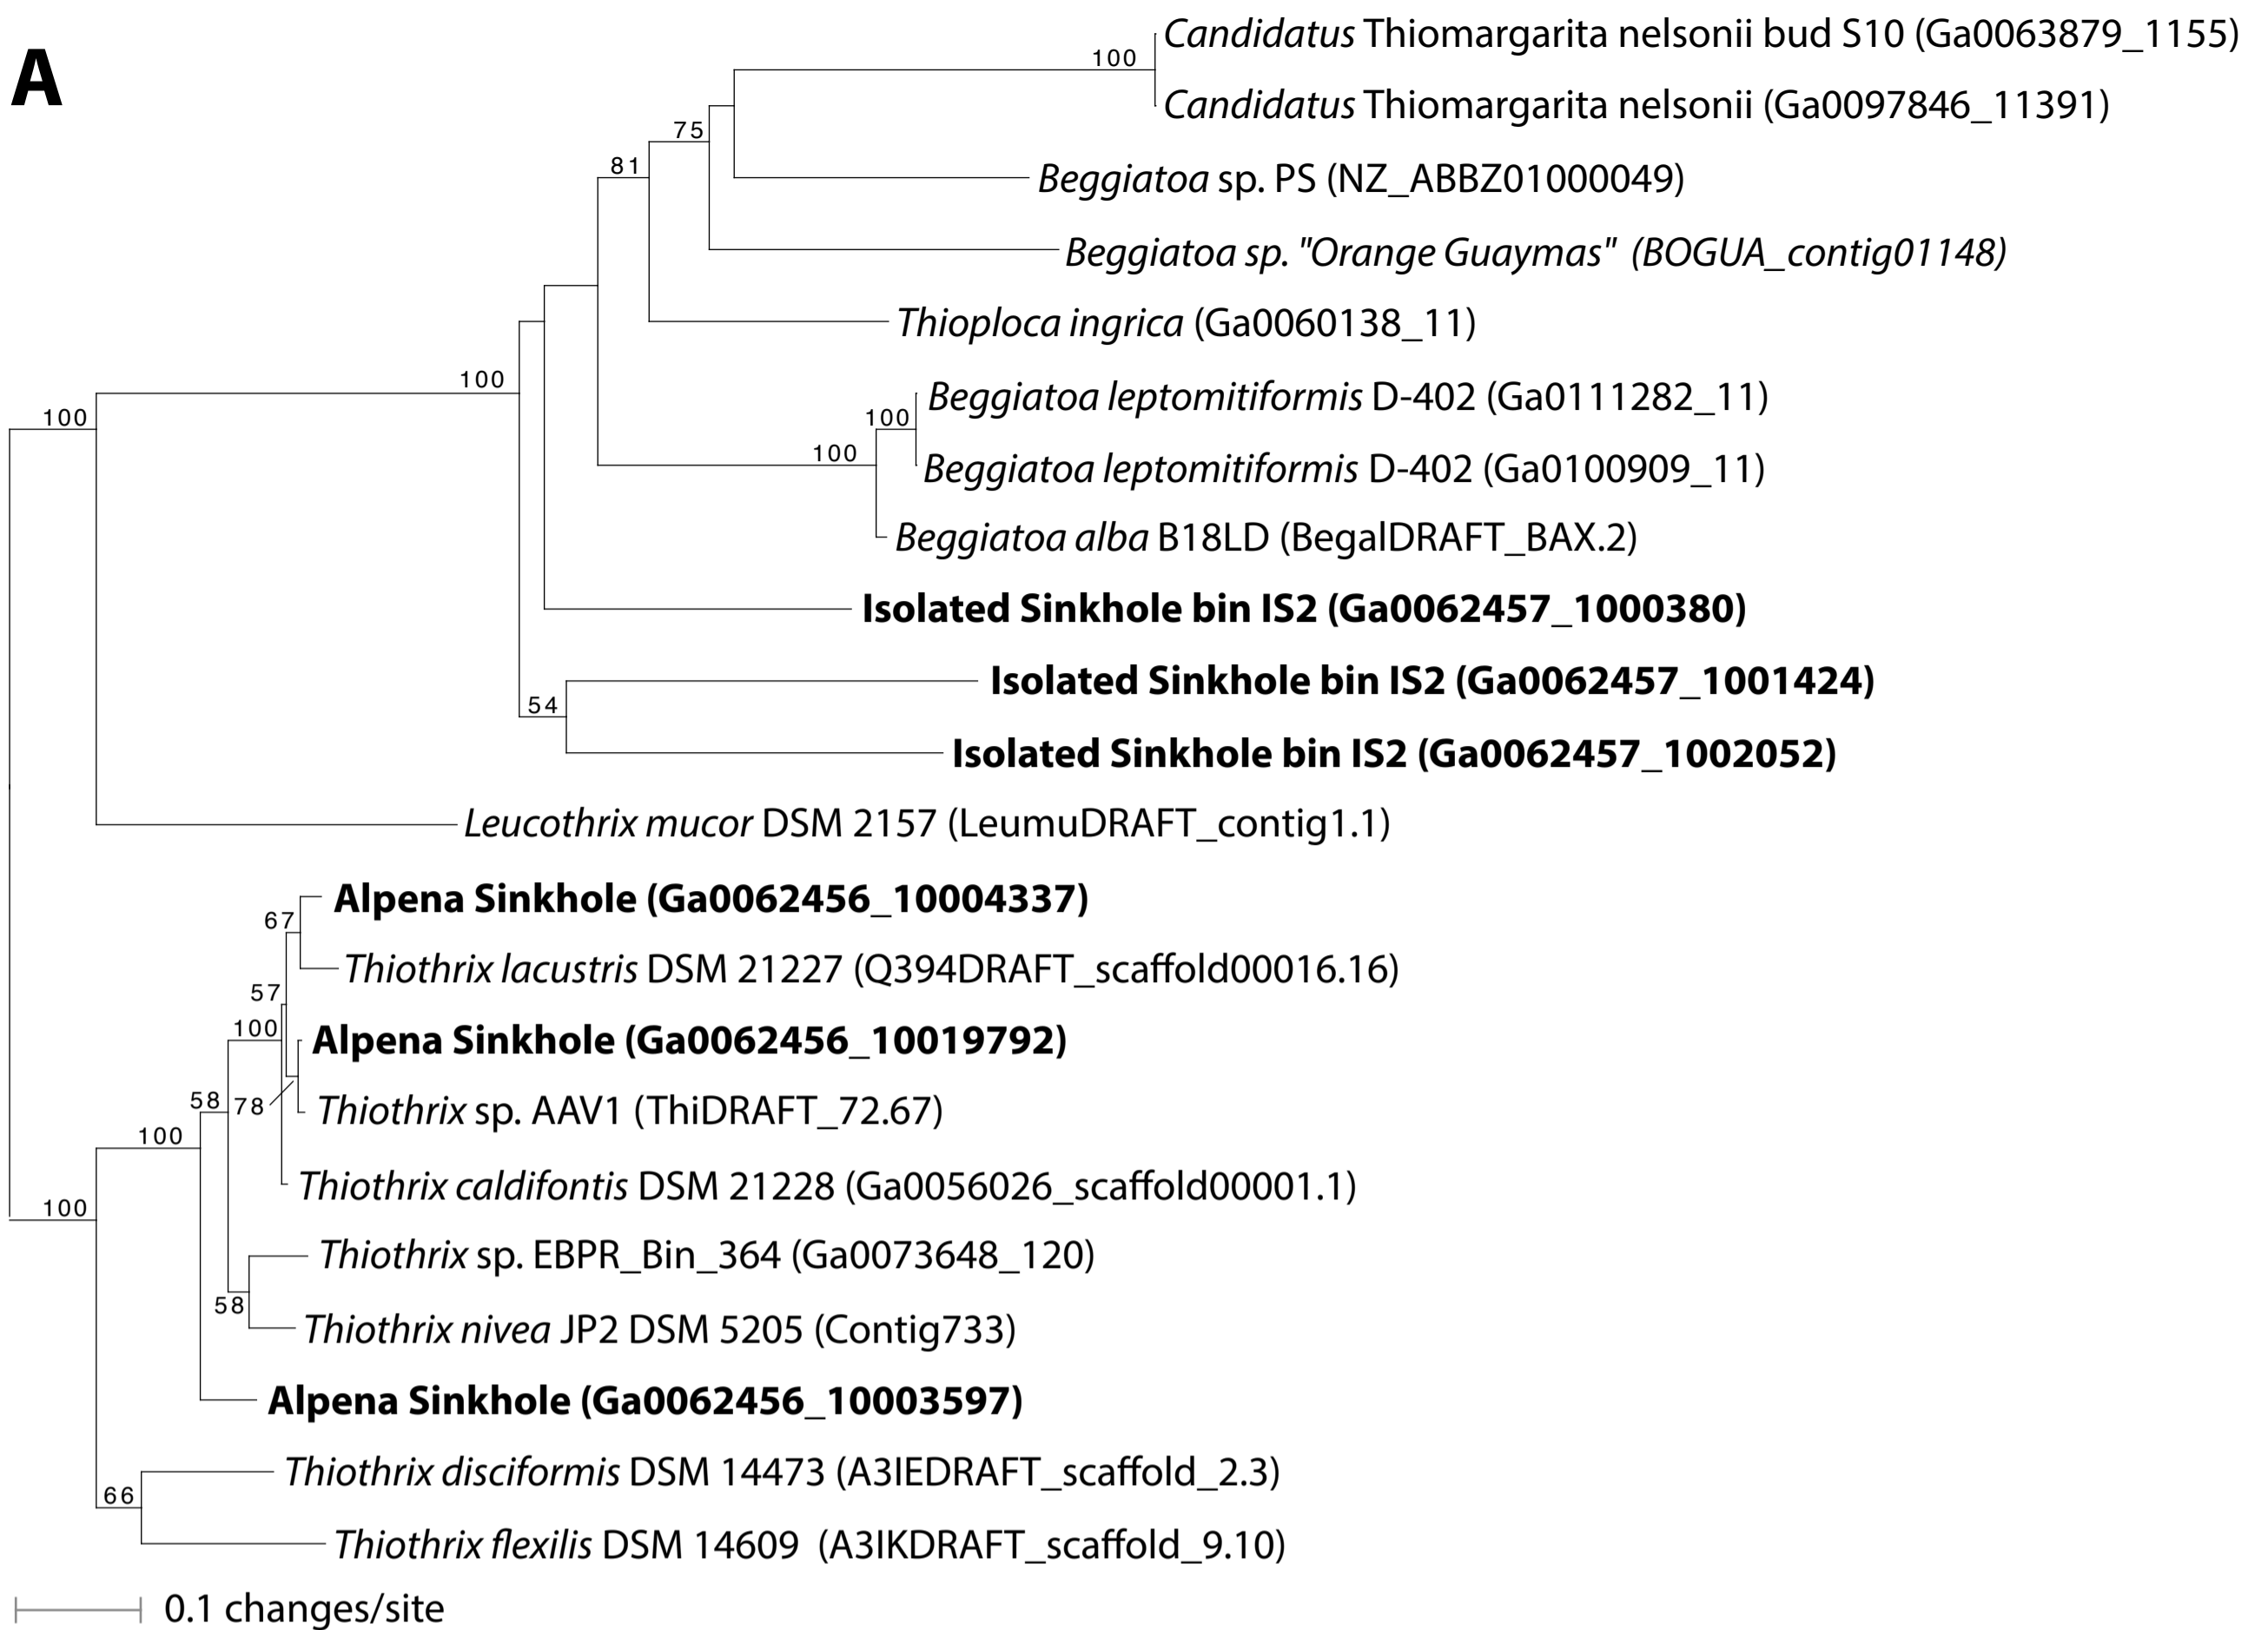**B**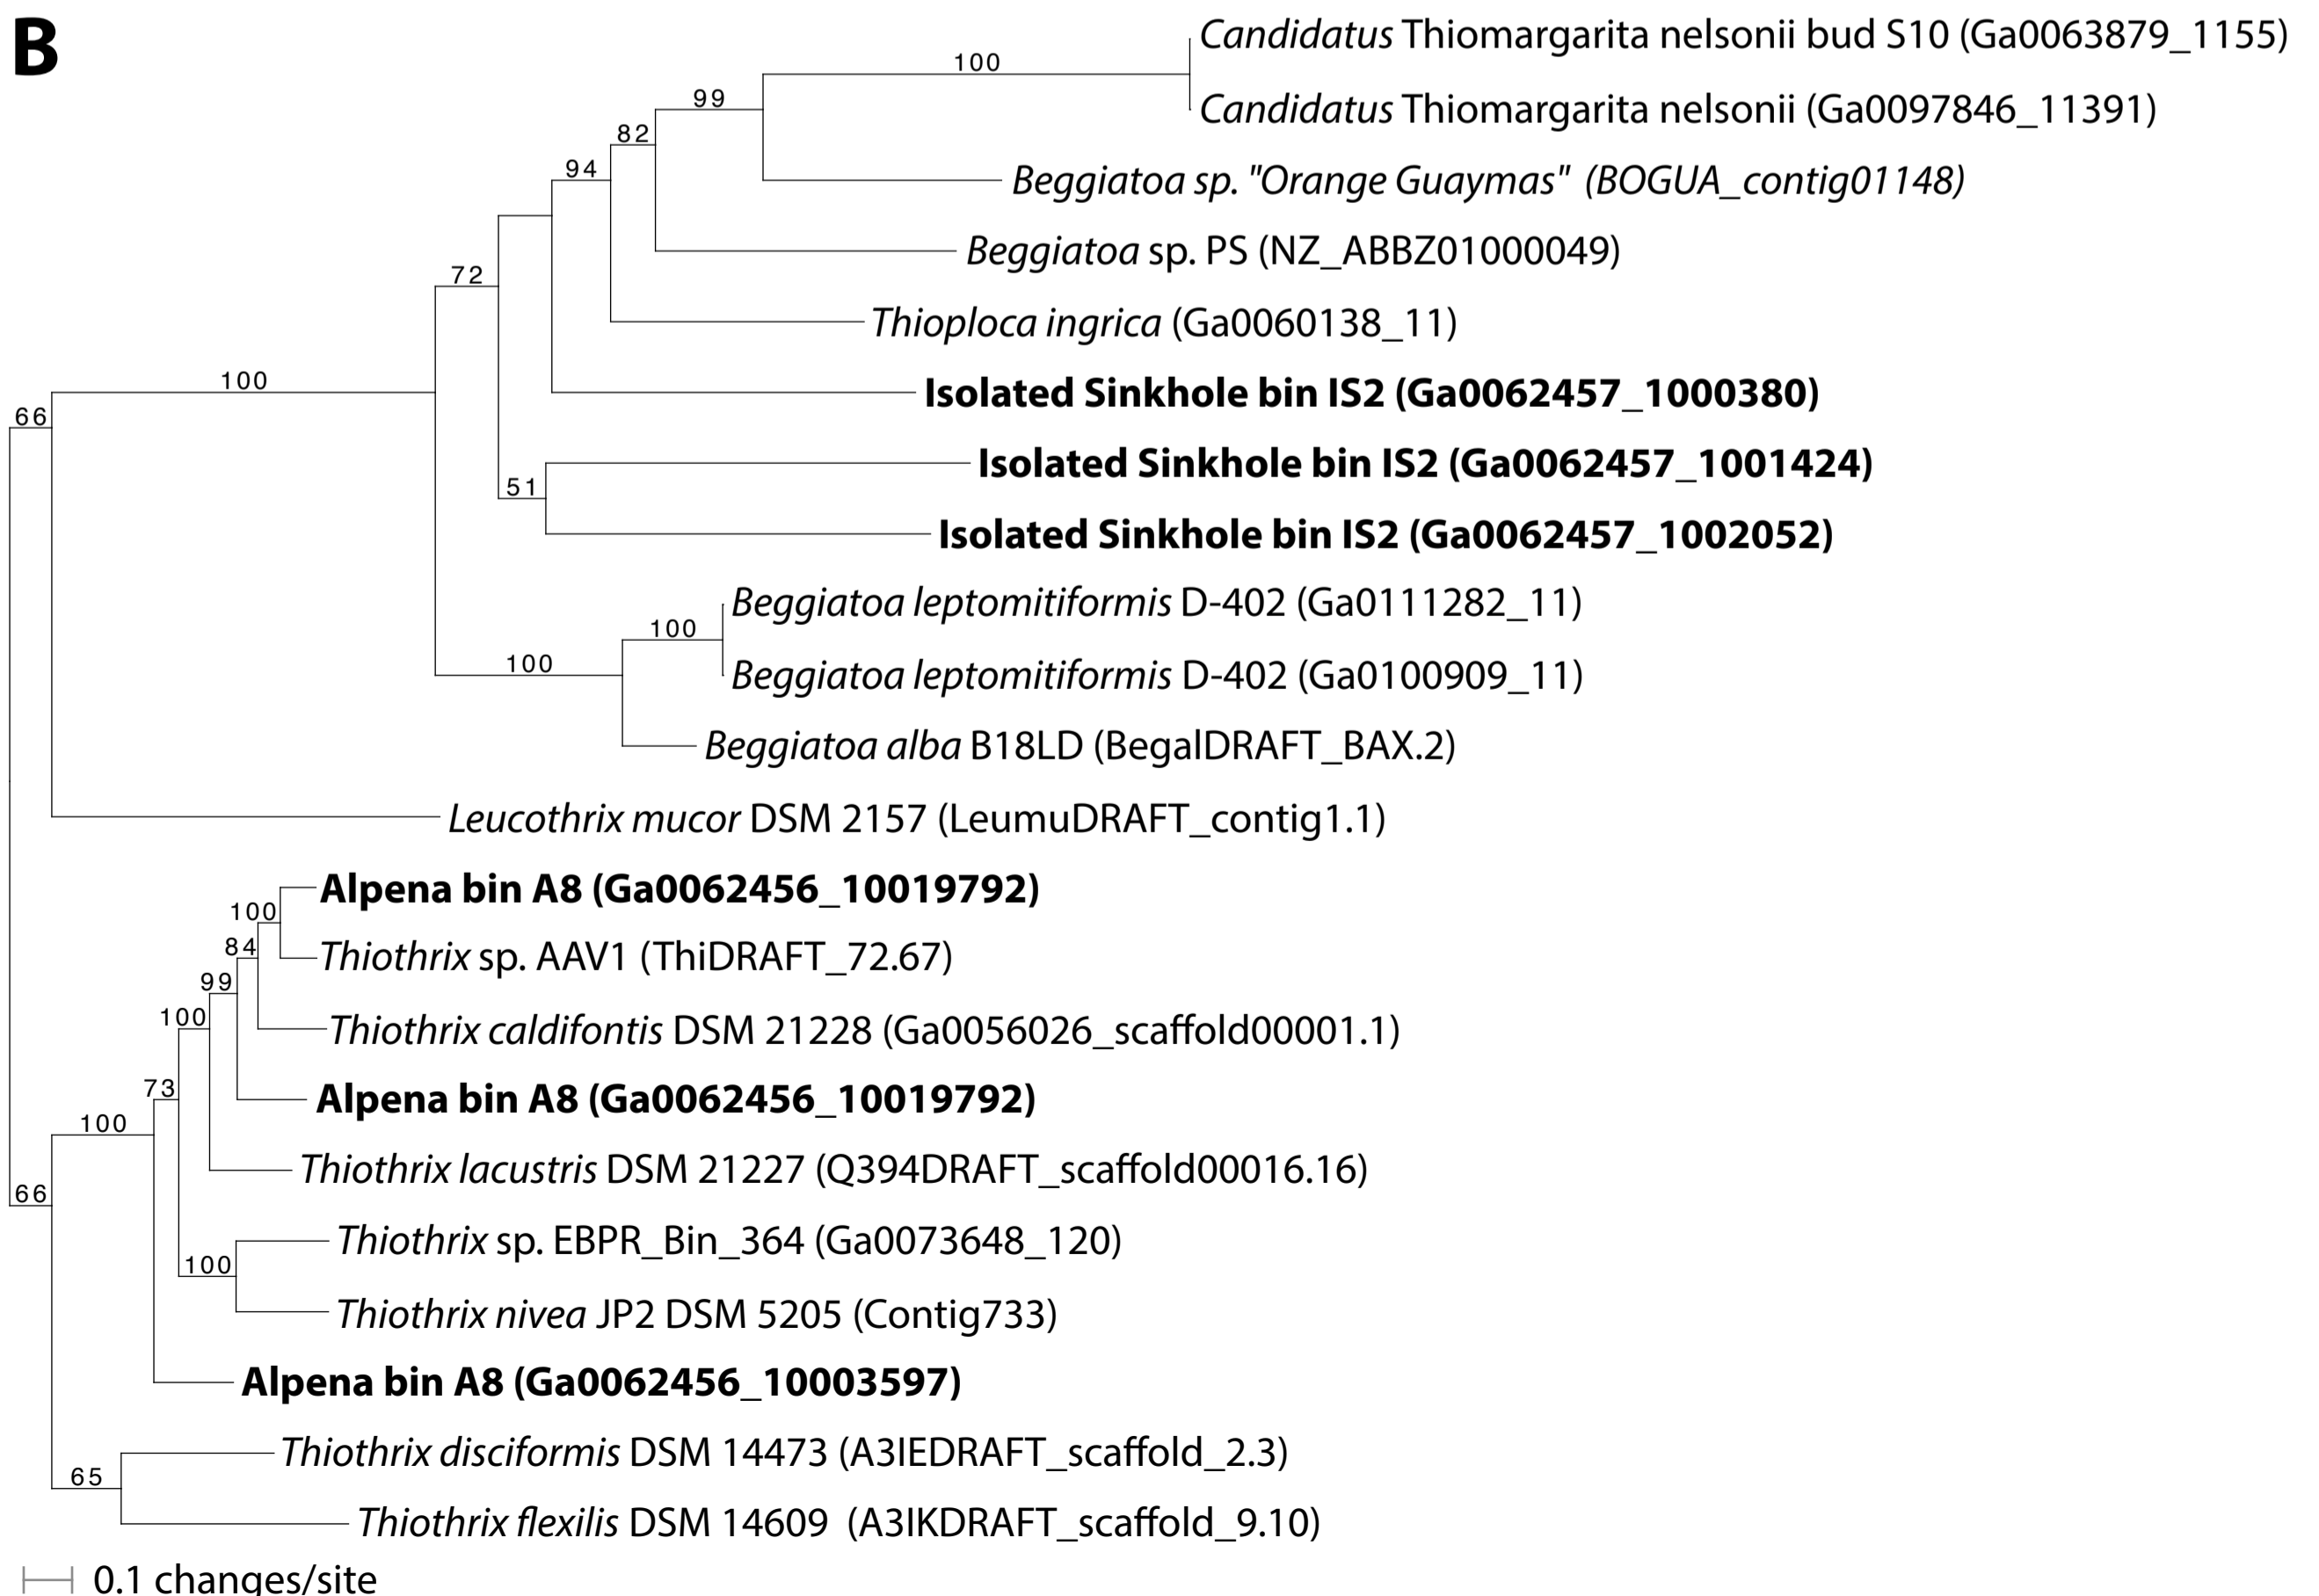

Supplement: Image_2.pdf [file Image_2.pdf]
